# Supplementary material for: Leveraging multi-variable observations to reduce and quantify the output uncertainty of a global hydrological model: evaluation of three ensemble-based approaches for the Mississippi River basin
Source: Copernicus journal article supplement (doi:10.5194/hess-28-2259-2024), 2024-05-30
Supplement: Supplementary file 2 [file hess-28-2259-2024-supplement.zip]

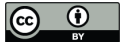

*Supplement of*

**Leveraging multi-variable observations to reduce and quantify the output uncertainty of a global hydrological model: evaluation of three ensemble-based approaches for the Mississippi River basin**

**Petra Döll et al.**

*Correspondence to:* Petra Döll (p.doell@em.uni-frankfurt.de)

- [hess-28-2259-2024-supplement-title-page.pdf](#)
- [Doell\\_et\\_al\\_2024-supplement.pdf](#)
- [Doell\\_et\\_al\\_2024\\_Supplement.xlsx](#)

The copyright of individual parts of the supplement might differ from the article licence.
